# Supplementary material
Source: PubMed Central journal article supplement (PMC10117337)
Supplement: infodemiology_v1i1e31983_app1.pdf [file infodemiology_v1i1e31983_app1.pdf]

**Multimedia Appendix 1:** Number of tweets by month comprising at least one of the terms "flu," "vaccination," "vaccine," "vaxx," and "covid."

| Month/Year | Number tweets<br>(N=2,782,720)<br>N (%) | of flu<br>(N=647,839)<br>N (%) | vaccination<br>(N=220,122)<br>N (%) | vaccine<br>(N=1,826,094)<br>N (%) | vaxx<br>(N=34,522)<br>N (%) | covid<br>(N=775,829)<br>N (%) |
|------------|-----------------------------------------|--------------------------------|-------------------------------------|-----------------------------------|-----------------------------|-------------------------------|
| 12/2019    | 1,197<br>(0.04%)                        | 631<br>(52.72%)                | 102<br>(8.52%)                      | 400<br>(33.42%)                   | 27<br>(2.26%)               | 0<br>(0.00%)                  |
| 01/2020    | 43,074<br>(1.55%)                       | 21,641<br>(50.24%)             | 2,702<br>(6.27%)                    | 15,872<br>(36.85%)                | 1,403<br>(3.26%)            | 3,132<br>(7.27%)              |
| 02/2020    | 65,993<br>(2.37%)                       | 36,387<br>(55.14%)             | 2,727<br>(4.13%)                    | 21,729<br>(32.93%)                | 1,744<br>(2.64%)            | 15,130<br>(22.93%)            |
| 03/2020    | 238,675<br>(8.58%)                      | 148,965<br>(62.41%)            | 4,497<br>(1.88%)                    | 64,952<br>(27.21%)                | 1,665<br>(0.70%)            | 61,223<br>(25.65%)            |
| 04/2020    | 197,011<br>(7.08%)                      | 78,394<br>(39.79%)             | 8,302<br>(4.21%)                    | 102,358<br>(51.96%)               | 1,938<br>(0.98%)            | 45,300<br>(22.99%)            |
| 05/2020    | 150,584<br>(5.41%)                      | 50,496<br>(33.53%)             | 5,875<br>(3.90%)                    | 89,465<br>(59.41%)                | 1,853<br>(1.23%)            | 37,727<br>(25.05%)            |
| 06/2020    | 76,073<br>(2.73%)                       | 28,289<br>(37.19%)             | 3,173<br>(4.17%)                    | 40,463<br>(53.19%)                | 887<br>(1.17%)              | 18,932<br>(24.89%)            |
| 07/2020    | 128,239<br>(4.61%)                      | 43,161<br>(33.66%)             | 4,891<br>(3.81%)                    | 75,732<br>(59.06%)                | 1,537<br>(1.20%)            | 35,395<br>(27.60%)            |
| 08/2020    | 110,794<br>(3.98%)                      | 34,001<br>(30.69%)             | 4,934<br>(4.45%)                    | 69,554<br>(62.78%)                | 1,507<br>(1.36%)            | 30,633<br>(27.65%)            |
| 09/2020    | 125,957<br>(4.53%)                      | 38,466<br>(30.54%)             | 4,106<br>(3.26%)                    | 81,735<br>(64.89%)                | 1,906<br>(1.51%)            | 35,993<br>(28.58%)            |
| 10/2020    | 107,615<br>(3.87%)                      | 47,340<br>(43.99%)             | 3,430<br>(3.19%)                    | 53,833<br>(50.02%)                | 883<br>(0.82%)              | 32,817<br>(30.49%)            |
| 11/2020    | 162,202<br>(5.83%)                      | 29,688<br>(18.30%)             | 6,292<br>(3.88%)                    | 122,168<br>(75.32%)               | 1,563<br>(0.96%)            | 47,654<br>(29.38%)            |
| 2020/12    | 346,928<br>(12.47%)                     | 34,709<br>(10.00%)             | 24,141<br>(6.96%)                   | 281,748<br>(81.21%)               | 4,247<br>(1.22%)            | 108,525<br>(31.28%)           |
| 2021/01    | 227,599<br>(8.18%)                      | 15,134<br>(6.65%)              | 31,640<br>(13.90%)                  | 175,760<br>(77.22%)               | 2,010<br>(0.88%)            | 75,997<br>(33.39%)            |
| 02/2021    | 198,355<br>(7.13%)                      | 11,830<br>(5.96%)              | 29,680<br>(14.96%)                  | 151,984<br>(76.62%)               | 1,962<br>(0.99%)            | 67,374<br>(33.97%)            |
| 03/2021    | 291,140<br>(10.46%)                     | 14,183<br>(4.87%)              | 42,204<br>(14.50%)                  | 228,382<br>(78.44%)               | 3,683<br>(1.27%)            | 82,158<br>(28.22%)            |
| 04/2021    | 311,284<br>(11.19%)                     | 14,524<br>(4.67%)              | 41,426<br>(13.31%)                  | 249,959<br>(80.30%)               | 5,707<br>(1.83%)            | 77,839<br>(25.01%)            |
