# Supplementary material
Source: PubMed Central journal article supplement (PMC10117337)
Supplement: infodemiology_v1i1e31983_app2.pdf [file infodemiology_v1i1e31983_app2.pdf]

**Multimedia Appendix 2:** Optimal number of clusters, the related maximal silhouette score for each month, and the parameters used for creating the topic clustering.

| Year    | Month     | Minimum term occurrence for being included in the analysis | Maximum distance between two words of a tweet for considering their potential semantic link | Number of features (words) investigated of the weekly tweets corpus | Silhouette Coefficient for the monthly optimal model with $k$ clusters |
|---------|-----------|------------------------------------------------------------|---------------------------------------------------------------------------------------------|---------------------------------------------------------------------|------------------------------------------------------------------------|
| 2019    | December  | 6                                                          | 7                                                                                           | 800                                                                 | 0.723                                                                  |
| 2020    | January   | 3                                                          | 7                                                                                           | 800                                                                 | 0.642                                                                  |
|         | February  | 4                                                          | 7                                                                                           | 700                                                                 | 0.586                                                                  |
|         | March     | 3                                                          | 7                                                                                           | 600                                                                 | 0.650                                                                  |
|         | April     | 3                                                          | 7                                                                                           | 800                                                                 | 0.668                                                                  |
|         | May       | 3                                                          | 7                                                                                           | 700                                                                 | 0.667                                                                  |
|         | June      | 4                                                          | 7                                                                                           | 800                                                                 | 0.580                                                                  |
|         | July      | 3                                                          | 6                                                                                           | 500                                                                 | 0.663                                                                  |
|         | August    | 3                                                          | 7                                                                                           | 800                                                                 | 0.645                                                                  |
|         | September | 3                                                          | 7                                                                                           | 700                                                                 | 0.663                                                                  |
|         | October   | 3                                                          | 7                                                                                           | 700                                                                 | 0.640                                                                  |
|         | November  | 3                                                          | 7                                                                                           | 800                                                                 | 0.667                                                                  |
|         | December  | 3                                                          | 7                                                                                           | 500                                                                 | 0.675                                                                  |
| 2021    | January   | 3                                                          | 7                                                                                           | 700                                                                 | 0.717                                                                  |
|         | February  | 3                                                          | 7                                                                                           | 600                                                                 | 0.721                                                                  |
|         | March     | 3                                                          | 7                                                                                           | 500                                                                 | 0.716                                                                  |
|         | April     | 3                                                          | 7                                                                                           | 500                                                                 | 0.656                                                                  |
| Overall | --        | 5                                                          | 14                                                                                          | 800                                                                 | 0.716                                                                  |
