# Supplementary material
Source: PubMed Central journal article supplement (PMC10117337)
Supplement: infodemiology_v1i1e31983_app3.pdf [file infodemiology_v1i1e31983_app3.pdf]

**Multimedia Appendix 3:** List of the 1000 most frequent n-grams in the 3 clusters.

**List of the 1,000 most frequent n-grams for cluster 1:**

vaccine, covid, flu, get, people, say, go, take, virus, like, vaccination, one, know, us, need, make, would, shot, think, work, year, die, want, death, time, still, many, first, even, give, see, come, test, well, bad, good, also, thats, state, day, pandemic, new, right, use, could, way, thing, tell, kill, case, never, help, vaccinate, cant, today, million, much, back, season, start, look, really, mask, let, month, may, everyone, number, stop, keep, receive, country, already, find, plan, sick, mean, believe, life, yet, week, wait, pfizer, end, happen, cause, nothing, world, yes, develop, show, live, report, please, every, wear\_mask, child, since, talk, feel, kid, safe, without, hope, available, doctor, long, anyone, spanish, put, care, spread, cdc, actually, effective, enough, lot, great, ever, school, risk, far, ask, maybe, last, sure, open, ive, point, another, less, something, fact, around, news, two, read, next, dos, theyre, hospital, disease, ill, protect, real, science, anything, seem, cure, create, soon, distribution, someone, cold, research, symptom, might, person, trial, part, second, least, appointment, data, health, reason, question, high, include, probably, study, must, control, continue, family, hear, problem, deadly, others, close, require, scientist, moderna, issue, etc, likely, either, side\_effect, place, patient, old, able, understand, different, dose, every\_year, allow, treatment, due, ready, population, fauci, best, post, always, sign, ppl, change, company, public, expect, guess, fight, wrong, thanks, begin, little, worry, infect, home, claim, hard, whats, early, true, compare, seasonal, learn, administer, rollout, yeah, rate, agree, shut, possible, dead, body, wonder, fear, update, check, base, follow, catch, distribute, normal, result, important, low, human, id, influenza, infection, prevent, concern, chance, lockdown, herd\_immunity, late, ok, matter, lead, age, become, theres, though, expert, idea, provide, share, pneumonia, schedule, medical, mrna, offer, dangerous, immunity, information, hold, community, approve, strain, vaxx, move, folk, full, via, group, roll, consider, mandate, development, teacher, release, common, fall, course, travel, response, hour, exactly, story, especially, fine, drug, literally, hit, yesterday, prove, death\_rate, deal, bc, last\_year, parent, supply, effort, set, answer, weve, past, treat, stay\_home, uk, safety, increase, list, regular, healthy, whole, article, thousand, system, kind, rush, unless, produce, elderly, half, history, record, variant, fda, explain, stay, cannot, serious, miss, choice, outbreak, access, total, add, drive, pass, h1n1, current, administration, info, positive, panic, site, 2nd, event, county, plus, eligible, 1st, nurse, count, illness, realize, antibody, track, cancer, global, fail, seriously, easy, quarantine, polio, official, effect, reaction, march, program, mom, go\_away, link, young, fast, process, several, however, choose, adult, level, year\_old, zero, along, phase, actual, experience, immune\_system, clear, mention, type, potential, nobody, cover, contract, exist, market, accord, absolutely, deliver, wish, medicine, recover, top, definitely, suppose, figure, ahead, hopefully, survive, slow, mortality\_rate, similar, make\_sure, area, quickly, none, imagine, future, currently, dr\_fauci, demand, vaccinated, wear, drop, except, expose, thought, affect, cost, decide, focus, daily, lock, suggest, three, healthcare, among, staff, step, whether, anyway, avoid, mass, efficacy, evidence, hop, glad, nearly, handle, pretty, local, january, rest, worker, experimental, prepare, save\_life, contagious, difference, date, large, proof, worldwide, complete, year\_ago, first\_dose, summer, reach, anti\_vaxxer, appear, entire, saw, race, individual, student, shoot, common\_cold, test\_positive, opinion, theyve, small, despite, warn, high\_risk, multiple, assume, later, responsible, mo, huge, completely, ignore, period, okay, senior, last\_week, delay, source, correct, regard, accept, epidemic, testing, strong, benefit, recommend, alone, non, relate, encourage, united\_state, survival\_rate, certain, outside, interest, protection, second\_dose, basically, make\_sense, decade, average, impact, major, confirm, husband, speed, return, heres, discuss, jab, contain, policy, per, apparently, winter, vulnerable, grow, rather, colorado, worth, public\_health, cv, immune, involve, decision, national, rise, hiv, meet, admit, action, bit, priority, mutation, remain, doubt, vaccines, form, target, statement, simply, estimate, suffer, lack, smart, social\_distancing, clinical\_trial, near, nope, lab, simple, single, mine, option, website, heard, store, build, good\_news, reduce, production, longer, fever, sars, willing, annual, even\_though, situation, goal, solution, otherwise, note, healthcare\_worker, mutate, perhaps, itll, forever, disappear, society, harm, address, necessary, clearly, honestly, daughter, online, every\_day, weird, till, carry, approval, obviously, damage, ridiculous, safe\_effective, reality, ebola, totally, sound, super, severe, argument, hospitalization, long\_term, researcher, injury, notice, within, amount, progress, location, mild, med, manufacture, threat, personally, quick, short, measure, usually, quite, yearly, truly, therapeutic, service, negative, immediately, term, four, technology, majority, message, injection, detail, unfortunately, scary, condition, opportunity, possibly, contact, effectiveness, reopen, percent, certainly, europe, prior, ensure, approach, emergency, stats, twice, restriction, challenge, present, convince, blood\_clot, pfizer\_moderna, recently, novel, occur, waste, hospitalize, massive, decline, often, depend, guarantee, mark, key, mostly, failure, recent, big\_deal, wash\_hand, doc, horrible, eventually, fully\_vaccinate, cell, surge, animal, danger, spike, fully, measles, misinformation, design, resource, comparison, delivery, strategy, timeline, educate, extra, neither, manage, medication, general, regardless, spring, couple, aware, pause, felt, shutdown, vs, sars\_cov, limit, moment, successful, across, thread, hcq, health\_care\_worker, product, shingle, wed, terrible, interesting, false, beyond, yr, prioritize, argue, double, ive\_never, success, everywhere, view, sort, excite, refer, curious, autism, back\_normal, respond, dna, two\_week, month\_ago, statistic, faster, pop, amaze, hesitancy, nursing\_home,

education, feeling, specific, stop\_spread, cough, manufacturer, critical, although, wave, recovery, practice, enter, grateful, third, plenty, discover, thru, allergy, math, hundred, paper, account, advocate, facility, unknown, gt, rna, interested, asap, worried, ex\_le, fair, transmission, predict, downplay, oxford, qualify, previous, blood, determine, hpv, project, weak, difficult, ventilator, provider, death\_toll, around\_world, standard, seek, advice, mortality, federal\_government, requirement, improve, ingredient, sometimes, italy, guideline, additional, immunization, version, struggle, model, mask\_mandate, widespread, perfect, apply, lucky, health\_care, booster, complication, essential\_worker, availability, eradicate, eliminate, tho, typical, review, headline, everyone\_else, employer, teach, confuse, logic, week\_ago, essential, easily, position, extremely, ability, 2nd\_dose, round, factor, respect, c19, precaution, infected, pain, accurate, new\_strain, careful, mass\_vaccination, common\_sense, purpose, identify, june, become\_available, useless, asymptomatic, andor, idk, sooner, usual, unlike, nyc, shortage, theory, repeat, oppose, perspective, physician, hysteria, exposure, impossible, personal, boost, er, reminder, beginning, tool, mn, status, self, besides, isolate, natural, look\_forward, inform, bother, subject, experiment, proven, living, az, pretty\_sure, overall, therefore, suspect, long\_term\_effect, safely, directly, smallpox, search, finish, associate, discussion, implement, earlier, next\_month, knowledge, globally, chart, diagnose, initial, trend, conversation, viral, placebo, fatality\_rate, normally, thankful, label, stay\_safe, obvious, combat, tech, sadly, stage, family\_member, peak, ton, rare, combine, honest, pre, protocol, fda\_approve, nurse\_home, request, distance, disagree, appreciate, appt, direct, vitamin, awful, lung, skip, significant, lethal, fast\_track, sickness, value, insurance, potentially, social\_distance, answer\_question, wo, annually, cheap, test\_negative, basic, trouble, percentage, document, advise, sense, hesitant

#### **List of the 1,000 most frequent n-grams for cluster 2:**

clinic, johnson\_johnson, dr, tomorrow, april, announce, team, appointments\_longer\_available\_walgreens, volunteer, morning, visit, astrazeneca, resident, covidvaccine, employee, next\_week, friday, monday, missouri, pharmacy, zip\_code, register, center, candidate, join, pfizers, tuesday, iowa, million\_dos, november, arrive, california, thursday, december, minnesota, weekend, wednesday, host, federal, co, partner, october, member, february, vaccination\_site, jan, feb, tonight, interview, oklahoma, five, appointment\_available\_walgreens\_saint, kansa, saint\_louis, saturday, utah, expand, urge, email, wisconsin, launch, modernas, college, health\_department, eligibility, university, health\_official, hi, sunday, shipment, page, july, new\_york\_time, participate, pfizer\_biontech, dec, announcement, covid19vaccine, distribution\_plan, ceo, nov, amid, agency, appointments\_longer\_available\_walmart, kansas\_city, smartnews, arkansas, pharmacist, va, pm, final, chief, september, nebraska, appointment\_available, former, reveal, apr\_apr\_sign\_zip, fact\_check, yay, episode, veteran, md, louis\_apr\_apr\_sign, meeting, task\_force, aim, tip, alert, director, spain, h1n1\_swine\_flu, st\_louis, six, series, michigan, district, survey, educator, vaccineswork, schedule\_appointment, nih, receive\_first\_dose, emergency\_use, august, tennessee, brazil, frontline\_worker, human\_trial, excited, yahoo, resume, sign\_zip\_code, walgreens, upcoming, authorize, high\_school, submit, mexico, first\_round, weekly, officially, dy, app, washington\_post, 3rd, appointment\_available\_walgreens\_kansas, pet, novavax, ohio, announces, equity, letter, first\_responder, investigation, dr\_anthony\_fauci, oct, brief, assist, covid\_socialdistancing\_flattenthecurve, gatewaypundit, registration, press\_conference, illinois, drive\_thru, washington, join\_us, podcast, partnership, mass\_vaccination\_site, health\_worker, click, britain, apr\_sign\_zip\_code, icymi, denver, tracker, chicago, astrazenecas, ago, health\_expert, guide, congratulation, world\_health\_organization, afternoon, sputnik, text, france, la, nbcnews, department, wearamask, live\_update, googlenews, getvaccinated, johnson, break\_news, feature, south\_dakota, tn, conduct, birthday, day\_later, suspend, thank\_president, investor, panel, nypost, arizona, pediatrician, tune, breakthrough, unit, phase\_1b, wait\_list, virtual, dos\_administer, via\_nyt, new\_mexico, professor, city\_apr\_apr\_sign, south, exclusive, british, age\_old, john, nyt, seattle, developer, agreement, appointments\_longer\_available\_cvs, louisiana, wsj, israeli, minnesotan, authorization, lawmaker, cdc\_fda, teen, mar, european, stl, england, yahoonews, hhs, tour, thanksgiving, coronavirusvaccine, usatoday, shortly, coronaoutbreak, pledge, committee, vaccination\_aign, underway, flushot, mobile, south\_africa, statewide, across\_state, initiative, 50k, soon\_possible, notify, file, st, hubby, reuters, firm, mid, cuba, memphis, affordable, nevada, cruise, cdc\_director, appointment\_available\_hy\_vee, shelby\_county, merck, wi, msnbc, bloomberg, kansas, business\_insider, approve\_fda, 10k, cnbc, fantastic, food\_drug\_administration, politico, surpass, operationwarpspeed, warns, north, officer, school\_district, missourian, mass\_vaccination\_event, pfizerbiontech, roll\_sleeve, npr, virginia, seven, historic, summit, hub, ct, maskup, massachusetts, coronaoutbreak\_wuhanflu\_chinaflu, innovation, virus\_coronavirusoutbreak\_coronaviruswuhan\_2019ncov, dolly\_parton, urgent, session, eligible\_receive, prof, maryland, mailonline, reportedly, institute, 1b, briefing, rank, discovery, award, next\_phase, arrival, president\_donald\_trump, postpone, oklahoman, first\_dose\_pfizer, guest, read\_enmnewshealth, bbc\_news, center\_disease\_control\_prevention, childrens, central, arm\_sore, health\_dept, conference, truck\_news, biontech, sept, webinar, coloradan, david, al, kc, oregon, gear, publichealth, aag\_aag2020, thrill, 4th, top\_story, fda\_cdc, jj, robert\_kennedy\_jr, 20k, slot, french, watch\_video, louis\_apr\_sign\_zip, tackle, scramble, expedite, may\_sign\_zip, pfe, journal, minister, cc, updated, polis, breitbartnews, coronaviruspandemic, light\_end\_tunnel, blog, health\_center, dashboard,

executive, transportation\_ship\_logistics\_follow, author, czar, urgent\_care, prep, biotech, st\_louis\_county, coronavirusoutbreak, regulator, pakistan, chat, statnews, vaccinessavelives, italian, association, manager, president\_joe\_biden, centre, segment, receive\_second\_dose, school\_staff, start\_monday, question\_answer, laboratory, petition, put\_together, back\_negative, percent\_effective, pod, de, need\_worry\_whats, appointments\_longer\_available\_hy, priority\_group, explore, representative, pass\_away, fresh, mass\_vaccination\_clinic, english, collaboration, eight, zero\_hedge, 1m, london, inmate, kit, foxnews, ap, nine, medical\_center, shots, billion\_dos, african\_american, reschedule, whole\_family, mississippi, eager, covax, evening, lottery, broadcast, mega, oxford\_astrazeneca, locate, frontline, proposal, arm\_hurt, thx, paul, nigeria, offer\_free, quarter, alabama, trail, minneapolis, deadline, japanese, milestone, per\_week, press\_release, hy\_vee, covidvaccines, 100m, indiana, nfl, adviser, regional, dentist, australian, 19vaccine, portal, john\_hopkins, next\_step, forecast, childrens\_health\_defense, walz, medical\_worker, pennsylvania, appointment\_schedule, covid2019, ty, alliance, offering, ne, michael, mercy, joint, metro, nc, abc\_news, pentagon, advisor, new\_jersey, administrator, tap, dedicate, phd, ksleg, kudos, nursing\_home\_resident, local\_pharmacy, todays, wear\_face, jennings, vaccinator, houston, reveals, hotline, omaha, covidvaccination, commission, oxford\_university, local\_health\_department, two\_week\_ago, commitment, 5k, boston, prospect, guardian, scotland, douglas\_county, johnsonandjohnson, dm, ows, discuss, anthony\_fauci, finncil\_red, pfizer, spring\_break, stayhome, scott, spoke, initiate, soar, public\_health\_expert, indias, zika, president\_elect\_joe\_biden, il, attorney, dr\_birx, log, allotment, alaska, county\_health\_department, research\_development, mayo\_clinic, friend\_mine, nhs, newspaper, chair, bill\_melinda\_gate\_foundation, outline, new\_story\_npr, bridge, virus\_coronavirusoutbreak\_covid2019\_wuhanvirus, covaxin, nvax, split, state\_health\_official, utpol\_utah, first\_dose\_moderna, philadelphia, town\_hall, ned\_resign, denmark, hour\_later, steve, ms, oversee, across\_globe, sec, huffpost, new\_york\_city, across\_world, noon, ireland, norway, first\_serve, ontario, cu, compensation, reservation, expert\_warn, washington\_state, restart, connector, inc, niece, visitor, teenager, ups, download, fun\_fact, fluseason, presentation, column, adult\_eligible, gtgt, outreach, appointments\_longer\_available\_cv, parking\_lot, appointment\_available\_walgreens\_jennings, wyoming, college\_student, dod, aug, coronavirususa, dispense, clinicaltrials, tribe, hall, pfizervaccine, exciting, missouris, become\_eligible, tula, bbc, cv\_walgreens, salk, notification, province, approve\_covid2019, economic\_recovery, biospace\_lifesciences\_biotechnology\_pharmaceutical, sedgwick\_county, gavi, apr, enrol, ar, provide\_update, staff\_member, philippine, kansan, surgeon\_general, graduate, vice\_president, cbs\_news, keep\_eye, kentucky, teacher\_staff, coming\_week, native, redfield, maine, health\_service, wellness, program\_engage\_80k\_patient, pre\_register, drfauci, second\_round, first\_batch, reuters\_via\_nyt, mill, utahns, library, tunnel, pay\_billion, nbc\_news, socialdistancing, book\_appointment, pharmacy\_technician, coronavirususa\_pandemic, end\_october, phase\_1a, janssen, one\_step\_closer, certify, news\_conference, originate\_spain, far\_behind, start\_kansa, james, los\_angeles, slide, year\_old\_woman, epochtimes, top\_priority, nursing, bell, vow, atlanta, mobilize, idaho, faq, inovio, brit, est, phase\_clinical\_trial, informative, part\_operation\_warp\_speed, west\_virginia, expansion, 5m, medtwitter, org, year\_old\_mother, rd, speaks, boris\_johnson, hour\_ago, documentary, midst, pending, big\_threat, welp, aigns, collaborate, public\_health\_emergency, outlook, waitlist, infectious\_disease\_expert, draft, sinovac, highly\_recommend, emergency\_authorization, post\_edit, show\_promise, pilot, 12k, bishop, johnson\_county, extra\_dos, gratitude, harvard, ino, san\_francisco, glad\_hear, cooperation, midwest, presser, couple\_week\_ago, com, recruit, prominent, economist, connecticut, appointment\_available\_walgreens, kevin, ii, alongside, thehill, cbs, registry, et, frontline\_healthcare\_worker, atlantic, sen, fighter, identification, nbc, robert, gilead, russia, ph, commissioner, community\_color, tipsnews, huffpostpol, abc, hawaii, smooth, andrew, council, ahead\_schedule, labs, mdh, european\_union, early\_march, sa, peter, reader, stun, arrives, article\_reuters, safety\_effectiveness, hydroxychloroquine, gardasil, incoming, twin, first\_shipment, via\_nyt\_new\_york, relief\_package, nearby, small\_town, job\_economy, arena, vatican, miami, click\_link, emergency\_approval, arkansan, pause\_johnson\_johnson, moleg, 3m, elementary\_school, grandson, ia, spark, sanofi, rare\_blood\_clot, lake, stanford, beijing, mysterious, journey, adam, factsmatter, newsletter, tomorrow\_morning, united, coronavaccine, coordination, testimony, staffer, bay, writes, speaker, verge, native\_american, dept, southern, covid19vaccines, passenger, 5th, hesitate, edition, loom, around\_globe, azn, earlier\_week, gen, smith, kroger, doh, monday\_morning, kcvaccinewatch, patch, hail, rival, ft, thisisourshot, uks, cvs, mum, next\_summer, lincoln, earnings, mass\_vaccination\_sit, ricketts, ray, north\_carolina, sat, apt, utahs, ps5, employer\_require, rev, lifepetitions\_petition\_culture\_life, prepares, jeff, mary, firefighter, news\_lifefite, declare\_national\_emergency, black\_jack, cause\_brain\_damage, health\_agency, downtown, since\_october, critical\_care, historian, breakingnews, fourth, counting, without\_fire, nebraskan, jonas\_salk, taiwan, additional\_dos, sugar\_cube, commentary, coronavirusupdates, fridge, h3n2, kelly, web, san\_diego, editorial, trading, upgrade, spread\_across, fightflu, onsite, world\_1st\_inactivated, okc, newly, risk\_education\_elevation\_kidney\_patient, free\_charge, quest, part\_warp\_speed, health\_minister, subscribe, whats\_difference, preparedness, fedex, ibio, 2b, renew, conquer, mass\_murder\_american, calendar, dr\_faucis, testify, full\_story, excitement, virus\_republican\_act, remove\_million\_infected, laura, pave\_way, sport\_event, secretary, safety\_concern, cancellation, publication, shot\_retweet,

community\_member, wv, detroit, phase\_iii, halloween, waiver, vega, impressed, chile, coronavirusupdate, spokesperson, surgeon, brace, health\_emergency, state\_department\_health, unapproved, across\_nation, extension, indigenous, mlb, programme, ave, dry\_ice, health\_care\_professional, second\_dose\_moderna, independence, stltoday, case\_hospitalization\_death, designate, 1k, vaccination\_programme, saint\_paul, springfield, midnight, move\_phase, city\_apr\_sign\_zip, philly, sep\_pm\_et, futuredanger\_indicator\_vaccination, cuban, spur, magazine, analyst, bolster, apps, appointment\_available\_walgreens\_black, navajo\_nation, scheduling, department\_health, colorados, lee, businessinsider, appointment\_available\_walmart\_kansas, adolescent, effect\_expose\_heatmap, wall\_street\_journal, dallas, south\_african, president\_elect\_biden, se, abc\_news\_abc, mom\_dad, set\_aside, oxfordastrazeneca, brazilian, iowas, thedailybeast, fluvaccine, right\_around\_corner, jack\_apr\_apr\_sign, admits, national\_institute\_health, mother\_law

### **List of the 1,000 most frequent n-grams for cluster 3:**

trump, american, call, try, china, lie, swine, government, biden, trust, push, force, bill\_gate, big, free, money, president, america, refuse, watch, thank, remember, fuck, medium, mandatory, line, support, everything, love, pay, man, run, job, lol, leave, turn, shit, lose, passport, guy, oh, gonna, order, hell, election, chinese, away, friend, hoax, vote, save, bring, stupid, instead, name, business, democrat, gate, send, kung\_flu, play, usa, anti, listen, buy, wuhan, yall, tweet, economy, blame, word, fake, damn, arm, break, head, governor, youtube, sorry, god, truth, hand, billion, happy, forget, obama, hey, sell, office, idiot, republican, face, finally, fund, citizen, promise, india, nation, leader, woman, video, wake, crazy, racist, black, inject, city, stand, speak, game, bill, credit, win, baby, scar, sit, big\_pharma, hate, political, govt, president\_trump, military, mind, politician, stuff, power, dems, together, minute, act, whatever, sad, hurt, profit, bet, aid, freedom, theyll, behind, afraid, charge, florida, code, wow, hes, wife, joke, russia, deny, bullshit, comment, promote, dumb, operation\_warp\_speed, funny, stock, house, card, destroy, trump\_administration, white\_house, attack, gop, twitter, walk, sound\_like, nice, spend, anymore, israel, eat, party, rule, poor, side, evil, write, law, cnn, surprise, fire, suck, food, beat, patent, eu, dad, gov, book, bird, son, pray, agenda, war, throw, warp\_speed, cancel, crisis, white, aint, chip, cut, liberal, btw, politics, ya, texas, take\_credit, left, ny, deserve, crap, msm, brain, ur, everybody, stick, poison, propaganda, joe, block, mess, donald\_trump, hide, remove, cant\_wait, dude, leadership, wtf, freak, russian, ban, fool, meanwhile, congress, yep, anti\_vaxx, pick, new\_york, rich, ship, mother, fix, kick, africa, screw, canada, fly, pro, scam, conspiracy, moron, debate, potus, else, fun, hydroxychloroquine, funding, pharma, bed, microchip, cool, wanna, fucking, enjoy, excuse, ignorant, joe\_biden, attempt, special, pull, inside, blue, miracle, rid, sleep, fill, relief, act\_like, cuomo, car, shame, cry, sheep, gotta, straight, fraud, conspiracy\_theory, fake\_news, corrupt, bidens, ppe, tv, nonsense, class, germany, eye, night, insane, bug, plague, lmao, tire, dog, bunch, everyday, narrative, criminal, industry, quit, bro, maker, steal, church, protest, first\_line, trumps, putin, liar, front, serve, abortion, good\_luck, christmas, remind, fault, rally, jump, light, complain, penny, google, 5g, crowd, scare, somehow, amazing, earth, boy, proud, omg, anyone\_else, asian, kinda, rest\_us, welcome, room, water, needle, hype, stomach, touch, elect, maga, guinea\_pig, pretend, police, bear, picture, anybody, girl, sister, bitch, cuz, poll, fan, mr, stimulus, hong\_kong, social\_medium, air, raise, press, heart, price, conservative, celebrate, facebook, invest, brother, racism, disaster, victim, stupidity, humanity, shock, vaccination\_card, mark\_beast, sue, mad, busy, fed, cause\_autism, front\_line, drink, investigate, pharmaceutical\_company, awesome, neighbor, gun, clean, last\_night, phone, bar, murder, battle, suddenly, ccp, aign, father, ignorance, selfish, wheres, sport, huh, reject, sir, lady, rona, supporter, alive, hero, town, pas, record\_time, hang, men, purchase, organization, jesus, spot, piece, smh, whos, board, laugh, biden\_administration, threaten, feed, wh, fox\_news, piss, americans, invent, faith, court, secret, favor, follower, secure, life\_save, wipe, bs, restaurant, tax, yea, thank\_god, aka, attention, declare, train, tie, whose, photo, trump\_supporter, killer, blow, president\_biden, planet, authority, voter, deep\_state, burn, movie, quote, defeat, disgust, clue, plandemic, indian, untested, politicize, arrest, pay\_attention, stock\_market, depopulation, defend, border, fear\_monger, street, trip, asshole, desantis, ruin, donate, insist, wonderful, prison, dear, yo, scream, senator, internet, building, reporter, jail, nah, buddy, lay, admin, pathetic, trump\_admin, calm, trumpvirus, attend, would\_rather, coincidence, connect, elite, upset, platform, somebody, hat, population\_control, pig, middle, voice, global\_pandemic, private, fox, praise, ad, til, clown, kill\_thousand, legal, un, prayer, replace, publicly, vet, dream, fl, grandma, tout, angry, beg, walmart, comply, drug\_company, chill, red, toxic, pack, worry\_whats, hot, mouth, incompetence, favorite, nwo, shove, sudden, energy, christian, connection, silly, body\_choice, operation, corruption, cult, small\_business, trade, sale, vacation, criticize, shop, injure, hmmm, deep, garbage, hug, hypocrite, army, desperate, bat, cash, minority, color, sacrifice, hire, enforce, ugh, stockpile, abt, door, swear, great\_job, oh\_wait, billgates, illegal, absolute, heal, tds, infrastructure, unemployment, incompetent, enemy, reserve, international, network, german, haha, mayor, movement, customer, pharmaceutical, genius, dem, journalist, crime, judge, digital, strike, chaos, everyones, plant, bout, land, pill, lawsuit, climate\_change, magic, park, nightmare, trash, rest\_world, hmm, investment, tired, soldier, pump, grocery\_store, dare, ride, leftist, outrage, nut, patriot, mr\_president, um, beautiful, powerful, brand, hello, ground, stimulus\_check, dollar, georgia, public\_school, hack, box, beer, tell\_truth, smoke, hed,

canadian, denier, privilege, organize, face\_mask, resist, bank, liberty, influence, manipulate, corporation, wealthy, cat, king, em, call\_hoax, got, divide, pa, pelosi, brag, fema, donald, commit, accuse, communist, disinformation, loser, disinfectant, heck, african, bos, scared, speech, brainwash, cop, resign, riot, whole\_thing, computer, foot, constitution, tyranny, concert, con, fat, rip, suicide, senate, wall, legit, withhold, mock, dumbass, globalist, dc, table, invite, certificate, airline, b4, gym, conspiracy\_theorist, consent, badly, whole\_world, heat, rep, everything\_else, flight, nj, west, religion, blind, empty, constituent, karen, called, honor, financial, pocket, nazi, uh, congrats, spin, pic, fee, star, plane, sun, billionaire, export, dark, insanity, weapon, denial, gate\_foundation, unbelievable, homeless, kiss, ex, bless, oh\_yeah, making, cousin, democratic, publix, harris, sham, assistance, republicans, commercial, trillion, immigrant, wash, hurry, jump\_line, dirty, zombie, billion\_dollar, pls, monster, national\_guard, amazon, golf, genocide, accomplish, hypocrisy, trick, orange, cheer, hows, covidiot, old\_age, image, sheeple, fb, security, stream, coordinate, duh, cross, stfu, creation, capitalism, bite, sight, draw, god\_bless, nose, skin, suspicious, lately, democracy, change\_mind, mail, soul, troll, tear, content, alot, fear\_mongering, palestinian, lord, expire, crash, green, ffs, americas, bleach, ticket, switch, qanon, prisoner, destroy\_economy, intentionally, worthless, rhetoric, ah, whoever, libs, ing, fellow, rock, ass, collapse, religious, socialist, wu, rant, presidency, foundation, foreign, meant, voting, gift, peace, psa, peep, accident, tiny, hilarious, troop, lose\_job, knew, hole, ball, socialism, trump2020, rumor, machine, fuel, depression, crush, caign, shall, shitty, camera, entire\_world, shirt, neighborhood, wait\_till, career, fakenews, theater, pharma\_company, hearing, iran, breath, giant, scheme, djt, change\_dna, sex, retire, engineer, hoard, eugenics, mile, brilliant, monkey, whine, chinavirus, punish, stance, mf, censor, meme, traitor, terrorist, bubble, waste\_time, red\_state, silence, anti\_science, truck, shameful, convenient, bottom, abuse, idiotic, factory, style, grip, bioweapon, po, rag, embarrass, sweet, bigpharma, reward, plot, trumpers, package, union, bully, bus, forced\_vaccination, microsoft, obama\_biden, desire, apologize, dump, loose, celebrity, kamala, endorse, drag, ha, vp, fell, beware, reverse, kamala\_harris, collect, witness, absolutely\_nothing, take\_responsibility, club, surprised, pure, smell, shout, sterilize, era, lawyer, donation, hair, mike, better, idiots, globalists, transition, grandmother, wth, eh, blue\_state, intention, undermine, impeachment, wind, chicken, rat, daddy, fuckin, grab, ai, brave, song, airport, obamas, dictator, yell, tag, tf
