# Supplementary material
Source: PubMed Central journal article supplement (PMC10117337)
Supplement: infodemiology_v1i1e31983_app4.pdf [file infodemiology_v1i1e31983_app4.pdf]

**Multimedia Appendix 4:** N-grams having the highest increase in occurrence week over week.

| <b>n</b> | <b>N-gram</b>  | <b>Week starting on</b> | <b>Previous week<br/>n/N (%)</b> | <b>n/N (%)</b>              | <b>Change<br/>Week over Week<br/>n (%)</b> |
|----------|----------------|-------------------------|----------------------------------|-----------------------------|--------------------------------------------|
| 1        | vaccine        | November 09, 2020       | 8,151/2,046,418<br>(0.40%)       | 50,987/2,046,418<br>(2.49%) | +42,836<br>(525.5%)                        |
| 1        | covid          | February 24, 2020       | 1,988/865,901<br>(0.23%)         | 11,838/865,901<br>(1.37%)   | +9,850<br>(495.5%)                         |
| 1        | flu            | February 24, 2020       | 6,606/850,385<br>(0.78%)         | 26,603/850,385<br>(3.13%)   | +19,997<br>(302.7%)                        |
| 1        | get            | November 09, 2020       | 2,953/686,401<br>(0.43%)         | 10,398/686,401<br>(1.51%)   | +7,445<br>(252.1%)                         |
| 1        | people         | February 24, 2020       | 947/391,101<br>(0.24%)           | 6,789/391,101<br>(1.74%)    | +5,842<br>(616.1%)                         |
| 1        | say            | November 09, 2020       | 1,223/265,933<br>(0.46%)         | 7,436/265,933<br>(2.80%)    | +6,213<br>(508.0%)                         |
| 1        | go             | November 09, 2020       | 1,385/241,735<br>(0.57%)         | 5,462/241,735<br>(2.26%)    | +4,077<br>(294.4%)                         |
| 1        | take           | November 09, 2020       | 974/230,778<br>(0.42%)           | 7,110/230,778<br>(3.08%)    | +6,136<br>(630.0%)                         |
| 1        | vaccination    | November 09, 2020       | 537/228,432<br>(0.24%)           | 1,830/228,432<br>(0.80%)    | +1,293<br>(240.1%)                         |
| 1        | virus          | February 24, 2020       | 1,186/222,040<br>(0.53%)         | 5,366/222,040<br>(2.42%)    | +4,180<br>(352.4%)                         |
| 2        | covid, vaccine | February 24, 2020       | 162/334,092<br>(0.05%)           | 1,549/334,092<br>(0.46%)    | +1,387<br>(856.2%)                         |
| 2        | get, vaccine   | November 09, 2020       | 302/149,333<br>(0.20%)           | 1,987/149,333<br>(1.33%)    | +1,685<br>(557.9%)                         |
| 2        | flu, shot      | February 24, 2020       | 407/68,518<br>(0.59%)            | 1,414/68,518<br>(2.06%)     | +1,007<br>(247.4%)                         |
| 2        | take, vaccine  | November 09, 2020       | 138/51,553<br>(0.27%)            | 1,207/51,553<br>(2.34%)     | +1,069<br>(774.6%)                         |
| 2        | get, flu       | February 24, 2020       | 487/50,962<br>(0.96%)            | 1,517/50,962<br>(2.98%)     | +1,030<br>(211.5%)                         |
| 2        | get, covid     | November 09, 2020       | 134/48,993<br>(0.27%)            | 486/48,993<br>(0.99%)       | +352<br>(262.7%)                           |
| 2        | flu, season    | February 24, 2020       | 401/47,727<br>(0.84%)            | 1,211/47,727<br>(2.54%)     | +810<br>(202.0%)                           |
| 2        | wear, mask     | November 09, 2020       | 288/46,062<br>(0.63%)            | 1,049/46,062<br>(2.28%)     | +761<br>(264.2%)                           |

|   |                                               |                   |                       |                          |                     |
|---|-----------------------------------------------|-------------------|-----------------------|--------------------------|---------------------|
| 2 | swine, flu                                    | February 24, 2020 | 73/41,231<br>(0.18%)  | 1,046/41,231<br>(2.54%)  | +973<br>(1313.5%)   |
| 2 | spanish, flu                                  | February 24, 2020 | 114/36,555<br>(0.31%) | 815/36,555<br>(2.23%)    | +701<br>(614.9%)    |
| 3 | get, covid, vaccine                           | November 30, 2020 | 272/33,108<br>(0.82%) | 1,208/33,108<br>(3.65%)  | +936<br>(344.1%)    |
| 3 | get, flu, shot                                | February 24, 2020 | 178/25,909<br>(0.69%) | 635/25,909<br>(2.45%)    | +457<br>(256.7%)    |
| 3 | vaccine, appointment,<br>available            | March 15, 2021    | 205/18,678<br>(1.10%) | 748/18,678<br>(4.00%)    | +543<br>(264.9%)    |
| 3 | vaccine, appointments,<br>longer              | March 15, 2021    | 115/16,287<br>(0.71%) | 543/16,287<br>(3.33%)    | +428<br>(372.2%)    |
| 3 | appointments, longer,<br>available            | March 15, 2021    | 115/16,287<br>(0.71%) | 543/16,287<br>(3.33%)    | +428<br>(372.2%)    |
| 3 | sign, zip, code                               | March 15, 2021    | 114/16,035<br>(0.71%) | 562/16,035<br>(3.50%)    | +448<br>(393.0%)    |
| 3 | apr, sign, zip                                | March 29, 2021    | 236/13,192<br>(1.79%) | 2,834/13,192<br>(21.48%) | +2,598<br>(1095.8%) |
| 3 | appointment, available,<br>walgreens          | March 29, 2021    | 553/10,721<br>(5.16%) | 2,549/10,721<br>(23.78%) | +1,996<br>(360.9%)  |
| 3 | longer, available,<br>walgreens               | March 29, 2021    | 535/10,361<br>(5.16%) | 2,753/10,361<br>(26.57%) | +2,218<br>(414.6%)  |
| 3 | receive, covid, vaccine                       | December 14, 2020 | 370/9,275<br>(3.99%)  | 1,404/9,275<br>(15.14%)  | +1,034<br>(279.5%)  |
| 4 | vaccine, appointments,<br>longer, available   | March 15, 2021    | 115/16,287<br>(0.71%) | 543/16,287<br>(3.33%)    | +428<br>(372.2%)    |
| 4 | apr, sign, zip, code                          | March 29, 2021    | 236/13,192<br>(1.79%) | 2,834/13,192<br>(21.48%) | +2,598<br>(1095.8%) |
| 4 | vaccine, appointment,<br>available, walgreens | March 29, 2021    | 551/10,719<br>(5.14%) | 2,548/10,719<br>(23.77%) | +1,997<br>(361.6%)  |
| 4 | appointments, longer,<br>available, walgreens | March 29, 2021    | 535/10,361<br>(5.16%) | 2,753/10,361<br>(26.57%) | +2,218<br>(414.6%)  |
| 4 | apr, apr, sign, zip                           | March 29, 2021    | 742/8,523<br>(8.71%)  | 1,485/8,523<br>(17.42%)  | +743<br>(100.0%)    |
| 4 | available, walgreens,<br>saint, louis         | March 29, 2021    | 163/6,889<br>(2.37%)  | 2,157/6,889<br>(31.31%)  | +1,994<br>(1223.3%) |
| 4 | sign, zip, code, vaccine                      | March 29, 2021    | 290/6,716<br>(4.32%)  | 1,026/6,716<br>(15.28%)  | +736<br>(252.6%)    |
| 4 | zip, code, vaccine,<br>appointment            | March 29, 2021    | 268/6,271<br>(4.27%)  | 945/6,271<br>(15.07%)    | +677<br>(252.6%)    |

|   |                                          |                |                      |                         |                    |
|---|------------------------------------------|----------------|----------------------|-------------------------|--------------------|
| 4 | code, vaccine,<br>appointment, available | March 29, 2021 | 268/6,264<br>(4.28%) | 942/6,264<br>(15.04%)   | +674<br>(251.5%)   |
| 4 | longer, available,<br>walgreens, saint   | March 29, 2021 | 134/4,074<br>(3.29%) | 1,221/4,074<br>(29.97%) | +1,087<br>(811.2%) |
